# Supplementary material for: Non-Conserved Amino Acid Residues Modulate the Thermodynamics of Zn(II) Binding to Classical ββα Zinc Finger Domains
Source: MDPI journal article supplement (doi:10.3390/ijms232314602), 2022-11-23
Supplement: s1 [file s1]

## Supporting Information

# Non-conserved amino acid residues modulate the thermodynamics of Zn(II) binding to classical $\beta\beta\alpha$ zinc finger domains

Katarzyna Kluska, Aleksandra Chorążewska, Manuel David Peris-Díaz,  
Justyna Adamczyk and Artur Krężel\*

*Department of Chemical Biology, Faculty of Biotechnology, University of Wrocław, Joliot-Curie 14a, 50-383 Wrocław, Poland*

\*To whom correspondence should be addressed

## Figures

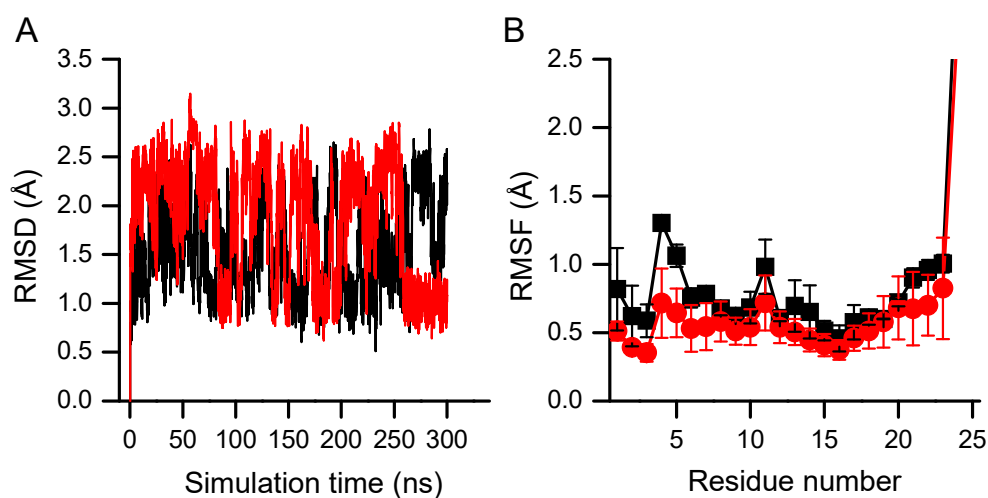

**Figure S1.** Root mean square deviation (RMSD) plot (A) and root mean square fluctuation (B) as a function of the simulation time assayed and the residue number for the zinc fingers CP1-1991 (black line) and CP1-2015 (red line). The error bar shown in (B) is calculated from three independent production runs of 300 ns.

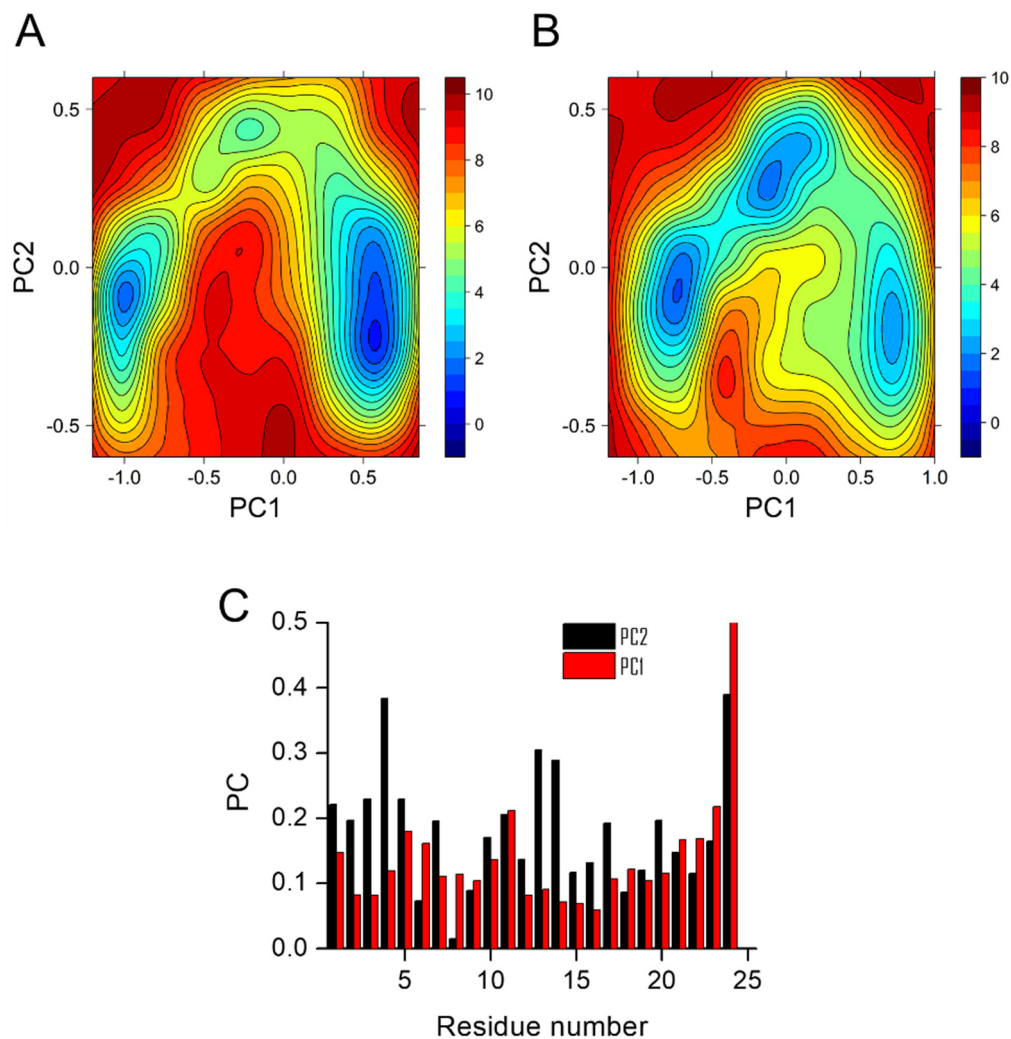

**Figure S2.** Estimated free energy surface (FES) using as reaction coordinates the principal components 1 and 2 for CP1-2015 (A) and CP1-1991 (B). Principal component (PC) values for PC1 and PC2 for CP1-1991 (C). Principal component (PC) 1 was related to flexibility in the C-terminus whereas the N-terminus and the middle part of the protein contributed the most to PC2. However, no differences were clearly observed between CP1-1991 and CP1-2015.

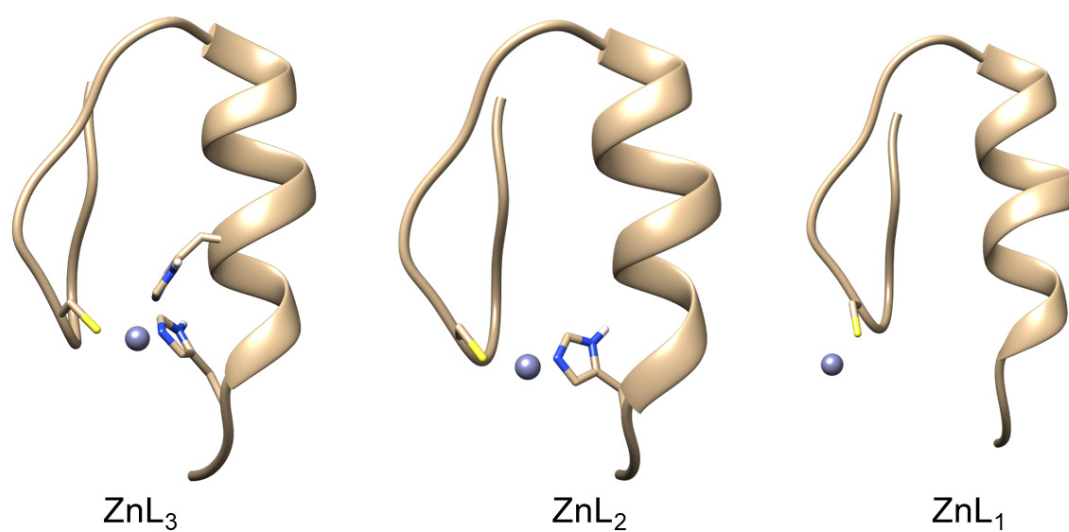

**Figure S3.** Zn(II) unbinding mechanism obtained from Steered MD simulations. The ZF CP1-1991 was used for representation, but the mechanism can be considered as general taking into consideration the Zn(II)-His swap.

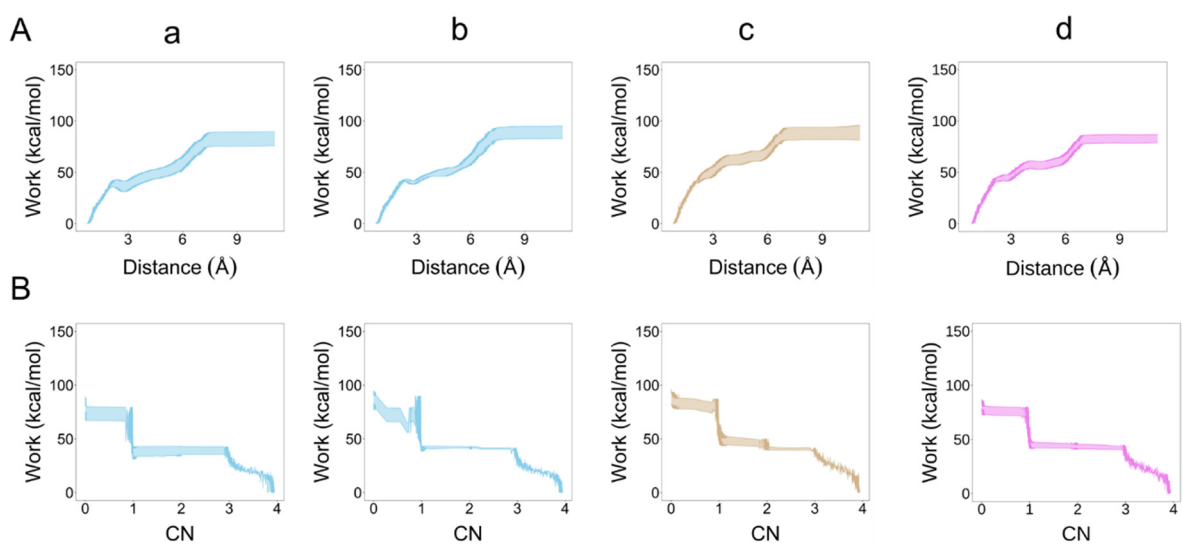

**Figure S4.** Steered MD simulations for the ZFs CP1-2015 and CP1-1991. (A) Work-extension curve CP1-1991(a), CP1-2015 pathway I (b) and pathway II (c) and for CP1-1991- $\alpha$  (d). (B) Work-extension curve for CP1-1991(a), CP1-2015 pathway I (b) and pathway II (c) and for CP1-1991- $\alpha$  (d) as a function of the contact number (CN).

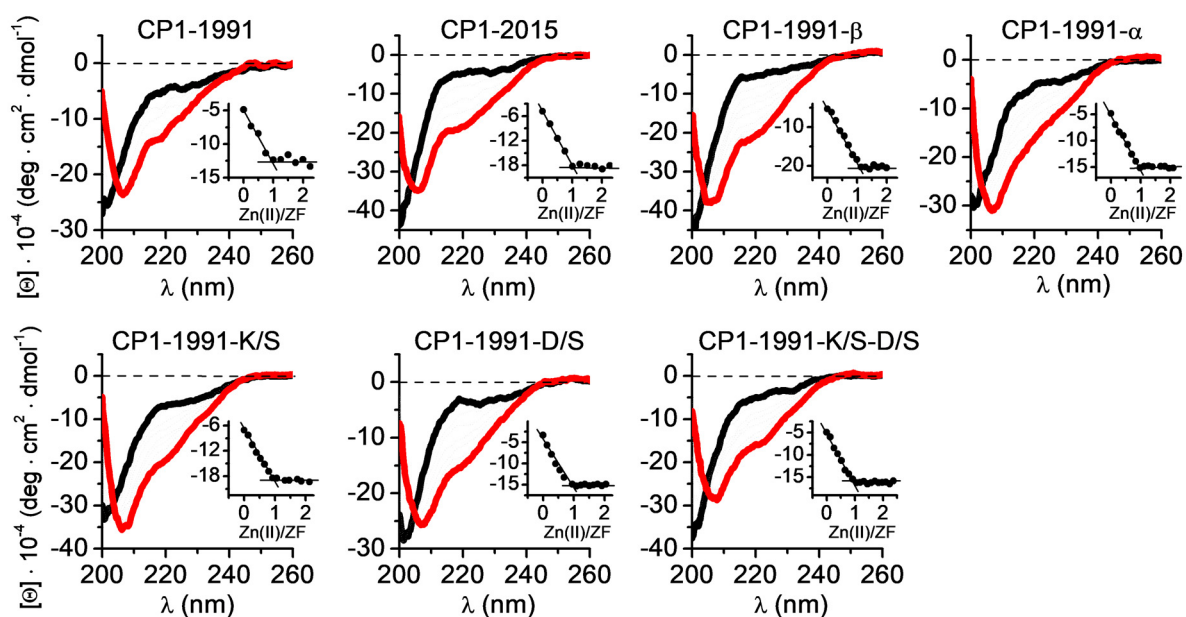

**Figure S5.** Spectropolarimetric titrations of CP1 ZF peptides with Zn(II). CD spectra of 25  $\mu$ M ZF peptide in 20 mM Tris-HCl buffer (100 mM NaCl, pH 7.4) in the presence of 0 eq. (red), 0.5 eq. (green) and 1 eq. (blue) of ZnSO<sub>4</sub>. The insets show the changes in ellipticity at 222 nm over the range of 0–2 Zn(II) eq.

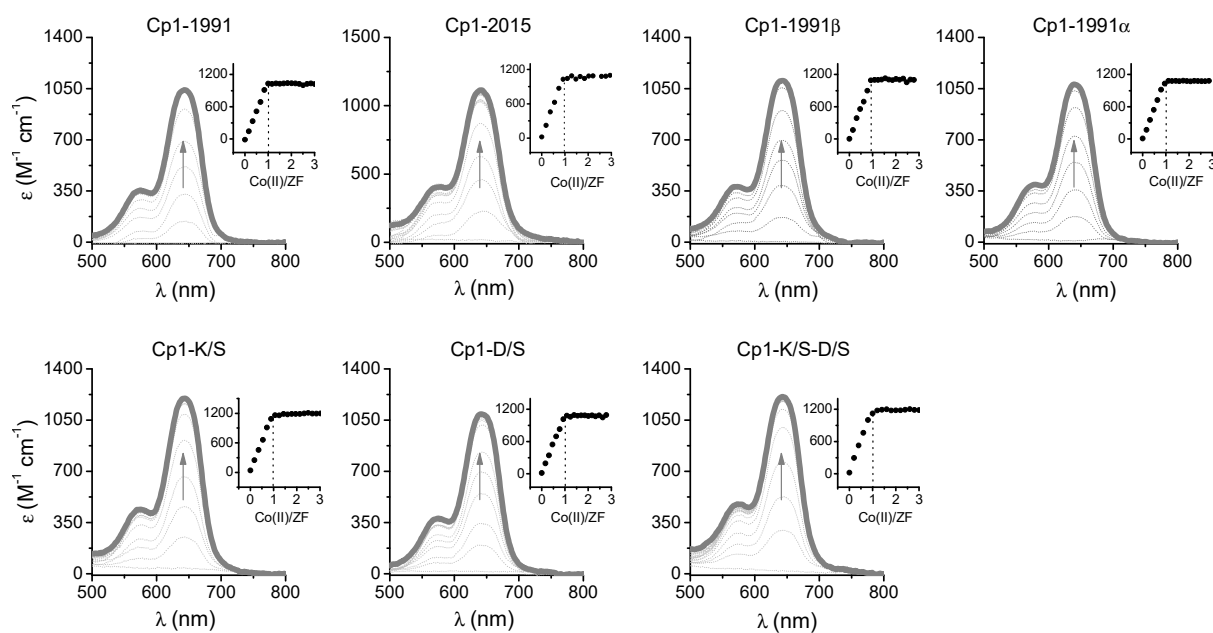

**Figure S6.** Spectrophotometric titration of CP1 ZF peptides with Co(II). The spectra recorded in the visible range (500–800 nm) of 25  $\mu\text{M}$  CP1 ZF peptide in 50 mM HEPES buffer  $I = 0.1$  M (from NaCl) pH 7.4 in the presence of 0–75  $\mu\text{M}$  Co(II). Absorbance values were converted to molar absorption coefficients based on peptide concentration. Insets represent absorbance increase at maximum wavelength as a function of Co(II)-to-ZF peptide molar ratio.

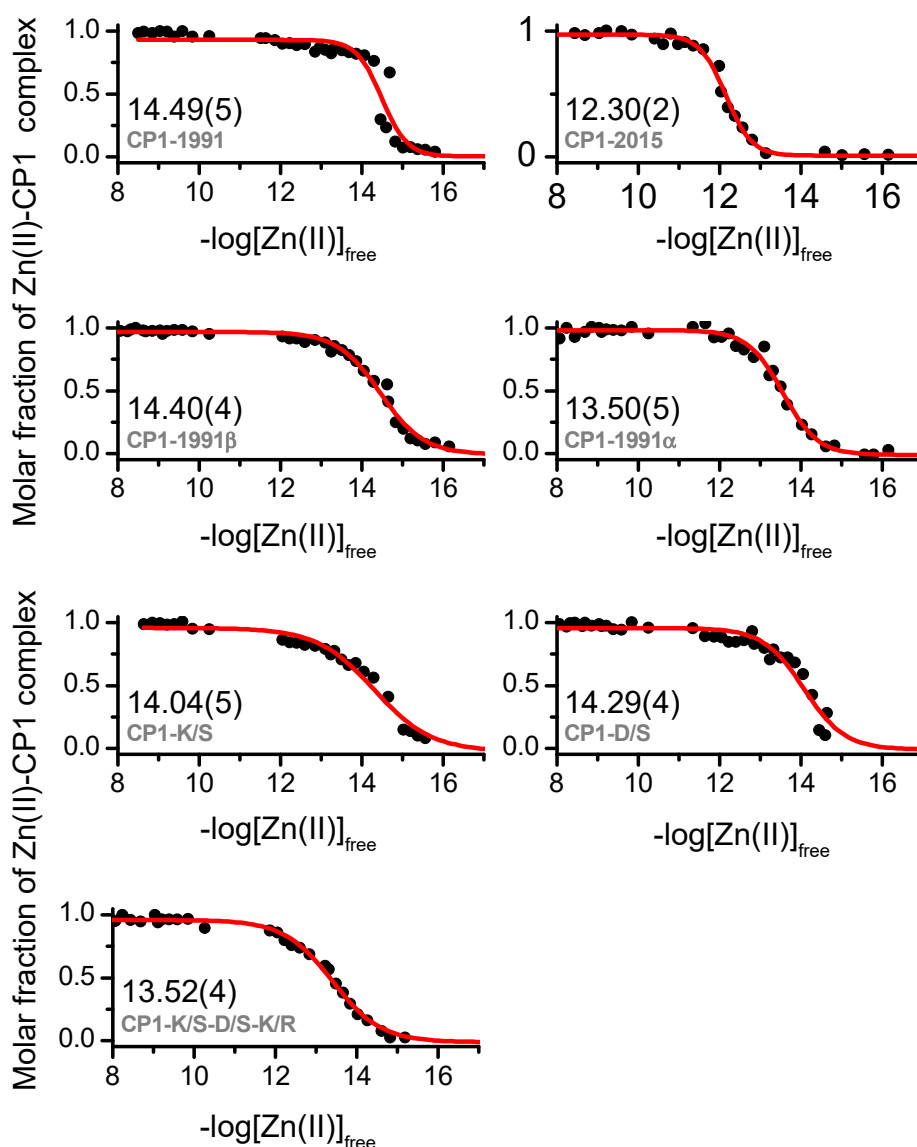

**Figure S7.** Isotherms of Zn(II) binding to studied CP1 ZF peptides in a set of metal buffers in 20 mM Tris-HCl buffer  $I = 0.1$  M (from NaCl) pH 7.4. The fraction of the ZnZF complex was calculated based on the CD changes in the applied  $-\log[\text{Zn(II)}]_{\text{free}}$  range. Red lines represent fits to logarithmic Hill's equation. The values presented in a particular graph are fit results and correspond to  $-\log K_d$  of the ZnZF complex.



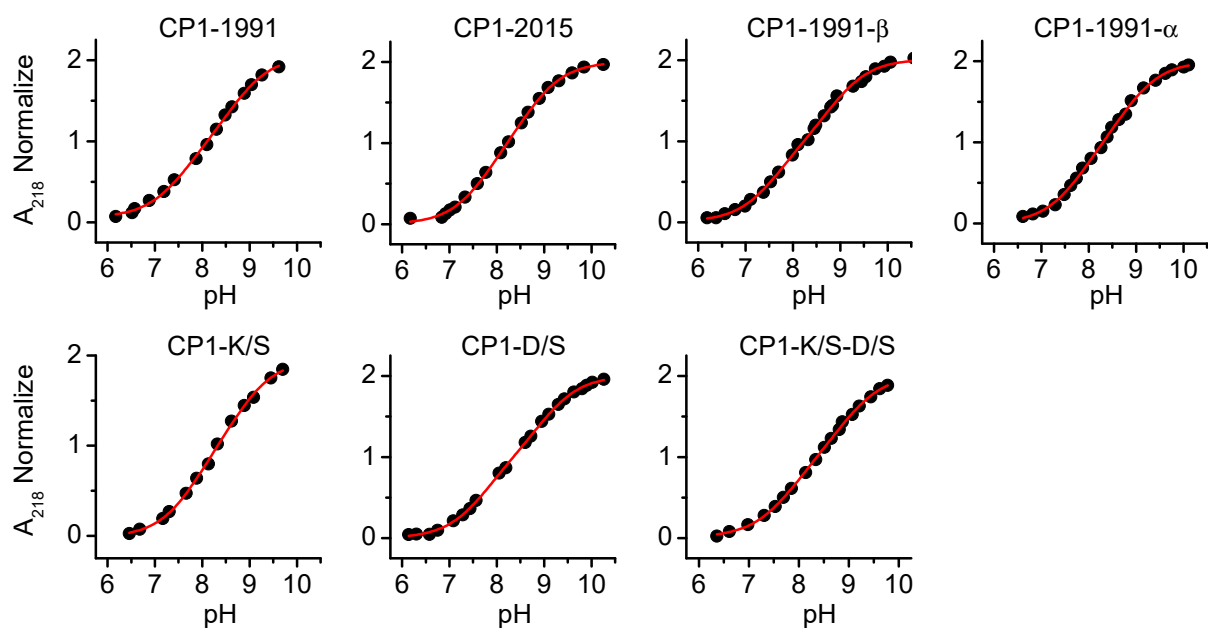

**Figure S8.** The pH-dependent absorption increase at 218 nm of 30  $\mu$ M of CP1 ZF peptides, 25°C,  $I = 0.1$  M (from NaCl). The relative best-fitting curves (red) obtained from fitting to two binding event equations (Eq. S3).

## Tables

**Table S1.** Calculated and experimental molecular masses of synthesised peptides that were used in this work. MW<sub>cal</sub> (calculated) and MW<sub>exp</sub> (experimental) values refer to averaged, not monoisotopic values obtained through ESI-MS spectra deconvolution.

| ZF peptide       | MW <sub>cal</sub> (g/mol) | MW <sub>exp</sub> (g/mol) |
|------------------|---------------------------|---------------------------|
| CP1-1991         | 2906.3                    | 2906.3                    |
| CP1-2015         | 2894.3                    | 2894.6                    |
| CP1-1991β        | 2921.3                    | 2921.1                    |
| CP-1991α         | 2879.2                    | 2879.2                    |
| CP1-1991-K/S     | 2865.2                    | 2865.4                    |
| CP1-1991-D/S     | 2878.2                    | 2878.0                    |
| CP1-1991-K/S-D/S | 2837.2                    | 2837.0                    |

**Table S2.** Steered MD simulation results for the Zn(II) dissociation from Zn(II)-loaded ZFs. Numbers 1 to 4 denote the order of residue unbinding in the metal-peptide complex. Frequency occurrence refers to the percentage of times this mechanism was observed for 40 independent runs. Independent simulations that match a particular pathway were grouped, and the rupture force and total work done were average.

| ZF        | Frequency occurrence (%) | Label pathway | Stepwise Zn-L bond dissociation |       |       |      | Mean rupture force (kcal/mol) | Total work done (kcal/mol) |
|-----------|--------------------------|---------------|---------------------------------|-------|-------|------|-------------------------------|----------------------------|
|           |                          |               | 1                               | 2     | 3     | 4    |                               |                            |
| CP1-1991  | 87                       | a             | Cys3                            | His23 | His19 | Cys6 | 16 ± 7                        | 89 ± 7                     |
| CP1-2015  | 35                       | b             | Cys3                            | His19 | His23 | Cys6 | 9 ± 4                         | 82 ± 6                     |
| CP1-2015  | 45                       | c             | Cys3                            | His23 | His19 | Cys6 | 9 ± 4                         | 81 ± 7                     |
| CP1-1991a | 85                       | d             | Cys3                            | His23 | His19 | Cys6 | 15 ± 7                        | 83 ± 4                     |

**Table S3.** Spectroscopic properties of Co(II) complexes with altered ZF peptides investigated in this work in 50 mM HEPES,  $I = 0.1$  M (from NaClO<sub>4</sub>), and pH 7.4.

| ZF peptide        | Complex stoichiometry | Binding residues | Maximum band wavelength (nm) | $\epsilon_{\text{max}}$ (M <sup>-1</sup> cm <sup>-1</sup> ) |
|-------------------|-----------------------|------------------|------------------------------|-------------------------------------------------------------|
| CP1-1991          | ML                    | CCHH             | 579                          | 350                                                         |
| CP1-2015          | ML                    | CCHH             | 579                          | 405                                                         |
| CP1-1991 $\beta$  | ML                    | CCHH             | 574                          | 405                                                         |
| CP1-1991 $\alpha$ | ML                    | CCHH             | 579                          | 400                                                         |
| CP1-1991-K/S      | ML                    | CCHH             | 576                          | 446                                                         |
| CP1-1991-D/S      | ML                    | CCHH             | 576                          | 386                                                         |
| CP1-1991-K/S-D/S  | ML                    | CCHH             | 575                          | 455                                                         |

**Table S4.** Acid dissociation constants of cysteine thiol ( $\text{p}K_{\text{a}}^{\text{SH}}$ ) groups of zinc finger peptides determined in this work. The abbreviation n.d. denotes not determined.

| ZF peptide        | $\text{p}K_{\text{a1}}^{\text{SH}}$<br>N-terminal | $\text{p}K_{\text{a2}}^{\text{SH}}$<br>C-terminal |
|-------------------|---------------------------------------------------|---------------------------------------------------|
| CP1-1991          | 7.54 $\pm$ 0.04                                   | 9.02 $\pm$ 0.04                                   |
| CP1-2015          | 7.70 $\pm$ 0.03                                   | 9.04 $\pm$ 0.03                                   |
| CP1-1991 $\beta$  | 7.59 $\pm$ 0.03                                   | 9.18 $\pm$ 0.03                                   |
| CP1-1991 $\alpha$ | 7.76 $\pm$ 0.03                                   | 9.15 $\pm$ 0.03                                   |
| CP1-1991-K/S      | 7.77 $\pm$ 0.03                                   | 9.15 $\pm$ 0.04                                   |
| CP1-1991-D/S      | 7.69 $\pm$ 0.02                                   | 9.31 $\pm$ 0.01                                   |
| CP1-1991-K/S-D/S  | 7.77 $\pm$ 0.02                                   | 9.26 $\pm$ 0.02                                   |
